# Supplementary material for: Synthesis and controlled hydrolysis of organolanthanide complexes with mono- and dianionic benzimidazole-2-thiolate ligands
Source: Royal Society of Chemistry journal article supplement (doi:10.1039/c0dt00129e), 2010-01-01
Supplement: c0dt00129e.pdf [file c0dt00129e.pdf]

## Supporting Information

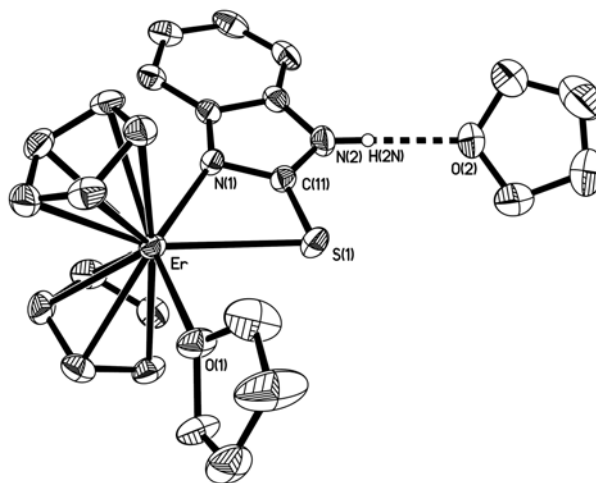

Figure S1 Molecular structure of  $\text{Cp}_2\text{Er}(\eta^2\text{-HBzimt})(\text{THF})_2$  (**1**) with 30% thermal ellipsoids. Hydrogen atoms have been omitted for clarity.

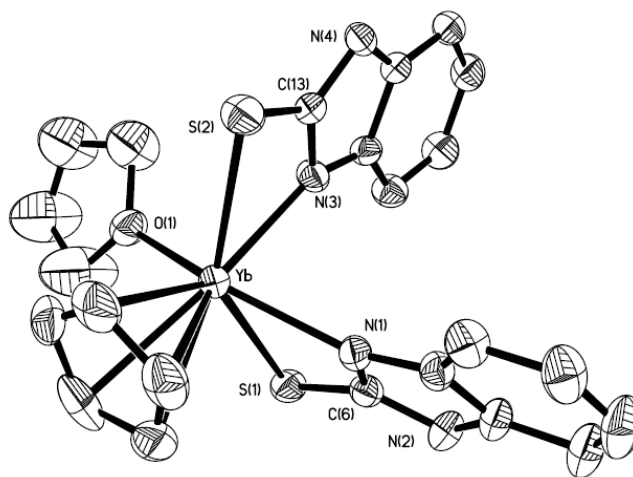

Figure S2 Molecular structure of  $\text{CpYb}(\eta^2\text{-HBzimt})_2(\text{THF})$  (**2**) (with 30% thermal ellipsoids). Hydrogen atoms have been omitted for clarity.

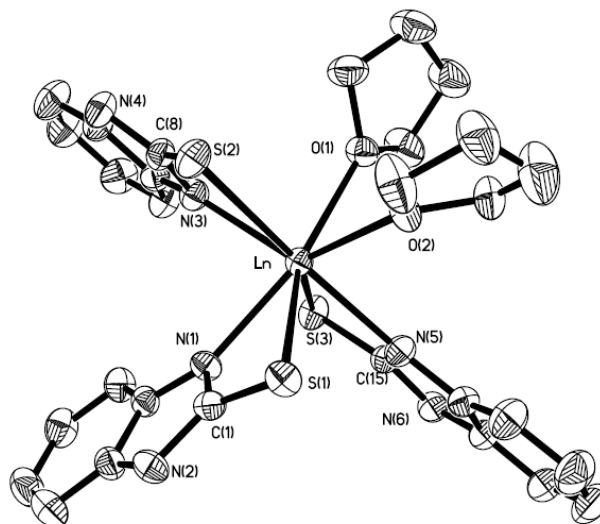

Figure S3 Molecular structure of  $\text{Ln}(\eta^2\text{-H}_2\text{Bzimt})_3(\text{THF})_2$  [ $\text{Ln}=\text{Yb}$  (**3**),  $\text{Er}$  (**4**)] (with 30% thermal ellipsoids). Hydrogen atoms have been omitted for clarity.

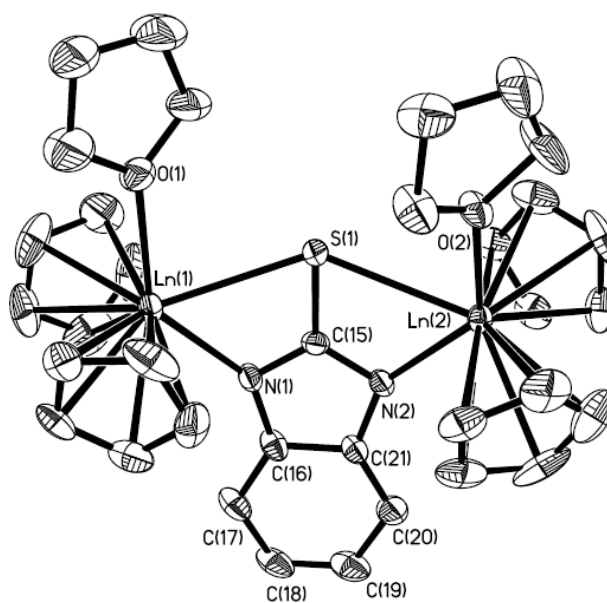

Figure S4 Molecular structure of  $[\text{Cp}_2\text{Ln}(\text{THF})]_2(\mu\text{-}\eta^2:\eta^2\text{-Bzimt})$  [ $\text{Ln}=\text{Yb}$  (**5**),  $\text{Er}$  (**6**),  $\text{Dy}$  (**7**),  $\text{Y}$  (**8**)] with 30% thermal ellipsoids. Hydrogen atoms have been omitted for clarity.

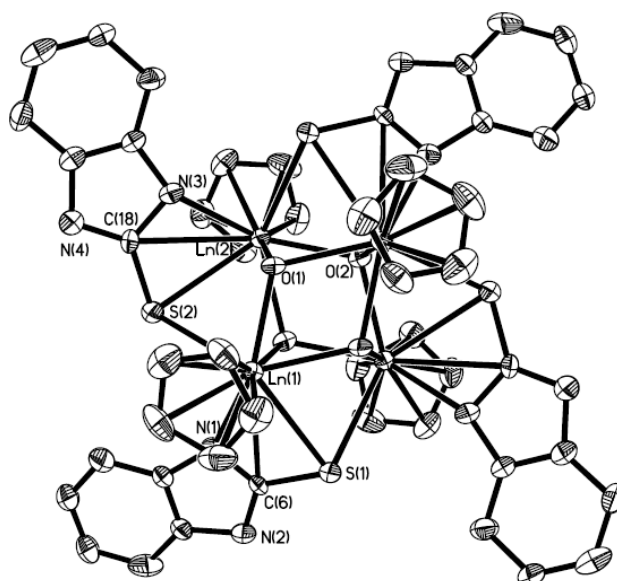

Figure S5 Molecular structure of  $[\text{CpLn}(\mu_3\text{-OH})(\mu\text{-}\eta^1:\eta^2\text{-HBzimt})]_4$  [ $\text{Ln}=\text{Yb}$  (**9**),  $\text{Er}$  (**10**),  $\text{Y}$  (**11**)] (with 30% thermal ellipsoids). Hydrogen atoms have been omitted for clarity.
